1 **Title:** Germline predisposition to pediatric Ewing sarcoma is uniquely characterized by inherited  
2 pathogenic variants in DNA damage repair genes

3

4 **AUTHORS/AFFILIATIONS**

|                      |                                    |            |
|----------------------|------------------------------------|------------|
| Riaz Gillani         | rngillani1@partners.org            | 1,2,3,4    |
| Sabrina Y. Camp      | scamp@broadinstitute.org           | 2,5        |
| Seunghun Han         | seunghun@broadinstitute.org        | 2,6        |
| Jill K. Jones        | jilljones@hms.harvard.edu          | 6          |
| Schuyler O'Brien     | wendeobrien@comcast.net            | 7          |
| Erin L. Young        | erin.olde@gmail.com                | 7          |
| Lucy Hayes           | lucy.hayes@hci.utah.edu            | 7          |
| Gareth Mitchell      | gareth.mitchell@hci.utah.edu       | 7          |
| Trent Fowler         | tfowler@peeltx.com                 | 7          |
| Alexander Gusev      | alexander_gusev@dfci.harvard.edu   | 5,8        |
| Junne Kamihara       | junne_kamihara@dfci.harvard.edu    | 1,3,4      |
| Katherine A. Janeway | katherine_janeway@dfci.harvard.edu | 1,2,3,4    |
| Joshua D. Schiffman  | joshua.schiffman@hci.utah.edu      | 7          |
| Brian D. Crompton    | briand_crompton@dfci.harvard.edu   | 1,2,3,4,*  |
| Saud H. AlDubayan    | saud_aldubayan@dfci.harvard.edu    | 2,5,9,10,* |
| Eliezer M. Van Allen | eliezerm_vanallen@dfci.harvard.edu | 2,5,11,*   |

5

6

7 **AUTHOR LIST FOOTNOTES**

- 8 1. Department of Pediatric Oncology, Dana-Farber Cancer Institute, Boston, MA 02215,  
9 USA
- 10 2. Broad Institute of Harvard and MIT, Cambridge, MA 02142, USA
- 11 3. Department of Pediatrics, Harvard Medical School, Boston, MA 02215, USA
- 12 4. Boston Children's Hospital, Boston, MA 02115, USA
- 13 5. Department of Medical Oncology, Dana-Farber Cancer Institute, Boston, MA 02115,  
14 USA
- 15 6. Harvard Medical School, Boston, MA 02115, USA
- 16 7. Huntsman Cancer Institute, 2000 Circle of Hope Dr, Room 4246, Salt Lake City, UT  
17 84112
- 18 8. Department of Epidemiology, Harvard T.H. Chan School of Public Health, Boston,  
19 Massachusetts, USA

- 20 9. Division of Genetics, Brigham and Women's Hospital, Boston, MA 02115  
21 10. College of Medicine, King Saudi bin Abdulaziz University for Health Sciences, Riyadh,  
22 Saudi Arabia  
23 11. Center for Cancer Genomics, Dana-Farber Cancer Institute, Boston, MA 02115, USA  
24

25 \*Corresponding authors

26 Brian D. Crompton  
27 Dana-Farber Cancer Institute  
28 450 Brookline Ave  
29 Boston, MA 02215  
30 Email: [briand\\_crompton@dfci.harvard.edu](mailto:briand_crompton@dfci.harvard.edu)  
31 Phone: 617-632-3000  
32

33 Saud H. AlDubayan  
34 Dana-Farber Cancer Institute  
35 450 Brookline Ave  
36 Boston, MA 02215  
37 Email: [saud\\_aldubayan@dfci.harvard.edu](mailto:saud_aldubayan@dfci.harvard.edu)  
38 Phone: 617-632-3000  
39

40 Eliezer M. Van Allen  
41 Dana-Farber Cancer Institute  
42 450 Brookline Ave  
43 Boston, MA 02215  
44 Email: [eliezerm\\_vanallen@dfci.harvard.edu](mailto:eliezerm_vanallen@dfci.harvard.edu)  
45 Phone: 617-632-3000  
46  
47

## 48 **Abstract**

49 More knowledge is needed around the role and importance of specific genes in germline  
50 predisposition to Ewing sarcoma to inform biological investigation and clinical practice. In this  
51 study, we evaluated the enrichment of pathogenic germline variants in Ewing sarcoma relative  
52 to other pediatric sarcoma subtypes, as well as patterns of inheritance of these variants. We  
53 carried out an ancestry-matched case-control analysis to screen for enrichment of pathogenic  
54 germline variants in 141 established cancer predisposition genes in 1138 individuals with  
55 pediatric sarcoma diagnoses (222 Ewing sarcoma cases) relative to identically processed  
56 cancer-free controls. Findings in Ewing sarcoma were validated with an additional cohort of 425  
57 individuals, and 301 Ewing sarcoma parent-proband trios were analyzed for inheritance patterns  
58 of identified pathogenic variants. A distinct pattern of pathogenic germline variants was seen in  
59 Ewing sarcoma relative to other sarcoma subtypes. *FANCC* was the only gene with an  
60 enrichment signal for heterozygous pathogenic variants in the discovery Ewing sarcoma cohort  
61 (OR 14.4, 95% CI 3.5 – 51.2,  $p = 0.002$ , FDR = 0.28). This enrichment in *FANCC* heterozygous  
62 pathogenic variants was seen again in the Ewing sarcoma validation cohort (OR 5.1, 95% CI  
63 1.2 – 18.5,  $p = 0.03$ , single hypothesis), representing a broader importance of genes involved in  
64 DNA damage repair, which were also nominally enriched in Ewing sarcoma cases. Pathogenic  
65 variants in DNA damage repair genes were acquired through autosomal inheritance. Our study  
66 provides new insight into germline risk factors contributing to Ewing sarcoma pathogenesis.

67

## 68 **Introduction**

69 Ewing sarcoma is the second most common bone and soft tissue cancer impacting  
70 children and adolescents worldwide<sup>1</sup>. It is an aggressive malignancy that is metastatic in 25% of  
71 cases at presentation and requires a very intensive treatment regimen including multiple  
72 chemotherapies, as well as surgery or radiation for local control. While overall survival for  
73 localized disease has improved to 75%, treatment confers significant morbidity, and cure rates

74 for metastatic and relapsed disease remain poor<sup>2</sup>. Through a better understanding of the  
75 predisposing genetic factors contributing to Ewing sarcoma pathogenesis, the pediatric  
76 oncology community would be able to develop more informed and less toxic treatment  
77 regimens, as well as better screen children at risk for disease, opening the door to opportunities  
78 for earlier detection and even prevention.

79 Ewing sarcoma is driven by *EWSR1-ETS* gene fusions<sup>1,3</sup>, and is often characterized by  
80 a complex rearrangement pattern known as chromoplexy<sup>4</sup>. The genetic events preceding these  
81 simple and complex rearrangements remain largely unknown. Prior work has suggested a role  
82 for pathogenic germline variants in DNA damage repair (DDR) genes in Ewing sarcoma, but  
83 systematic case-control analyses to precisely define this role have not been undertaken<sup>5,6</sup>.  
84 Much of what is known about germline predisposition to Ewing sarcoma has centered on  
85 common population variants identified as susceptibility loci from genome-wide association  
86 studies (GWAS)<sup>1,7-9</sup>, and a comprehensive evaluation of the relative contribution of rare coding  
87 pathogenic germline variants is largely incomplete.

88 Furthermore, a more complete understanding of the familial inheritance patterns of  
89 genetic risk factors in Ewing sarcoma is needed to guide cascade testing strategies with broad  
90 potential clinical impact. While guidelines for familial testing have been developed for various  
91 cancer predisposition syndromes<sup>10,11</sup>, patients with Ewing sarcoma and family members are not  
92 uniformly referred for genetic testing. Case reports of siblings with metachronous Ewing  
93 sarcoma diagnoses have suggested that germline variants shared within families may increase  
94 risk, but these have not yet been identified<sup>12</sup>. Family-based germline sequencing, such as the  
95 analysis of parent-proband trios, is thus a powerful tool for better understanding the inheritance  
96 of pathogenic germline variants in pediatric sarcoma generally, and Ewing sarcoma in  
97 particular<sup>13</sup>.

98 We hypothesized that through a systematic comparative analysis of germline  
99 predisposition across pediatric sarcoma subtypes, we would elucidate distinct patterns of rare

100 coding pathogenic variants in Ewing sarcoma. We therefore undertook a three-stage study  
101 comprising 1) an ancestry-matched case-control analysis utilizing a discovery pan-sarcoma  
102 cohort, 2) validation with an ancestry-matched case-control analysis of an additional cohort of  
103 patients with Ewing sarcoma, and 3) evaluation of inheritance in germline variants for patients  
104 with Ewing sarcoma and their parents.

105

## 106 **Materials and Methods**

### 107 ***Ethics Approval and Consent to Participate***

108 Written informed consent from patients and institutional review board approval, allowing  
109 comprehensive genetic analysis of germline samples, were obtained by the original studies that  
110 enrolled patients. The secondary genomic and deep-learning analyses performed for this study  
111 were approved under Dana-Farber Cancer Institute institutional review board protocols 21-143  
112 and 20-691. This study conforms to the Declaration of Helsinki.

### 113 ***Study Participants***

114 A total of 1138 individuals with pediatric sarcoma diagnoses were included in the  
115 discovery cohort (Supplemental Methods). A combination of germline whole-genome  
116 sequencing (WGS) and whole-exome sequencing (WES) was aggregated for these individuals  
117 across four data sources; WGS was converted to WES equivalents using predefined target  
118 intervals to focus on coding variants only (Supplemental Methods). For validation, germline  
119 WGS for 425 individuals with Ewing sarcoma from the Gabriella Miller Kids First (GMKF)  
120 program was utilized. For 301 individuals with Ewing sarcoma from GMKF, germline WGS for  
121 parents was available (602 parents) and used for analysis of inheritance among trios (Tables S1  
122 and S2; Supplemental Methods). Sequenced exomes for 24128 cancer-free individuals from six  
123 cohorts were extensively quality controlled, identically processed, and analyzed in the same  
124 way as cases for use as controls in this study (Supplemental Methods).

### 125 ***Population Stratification***

126 Principal component analysis (PCA) was undertaken utilizing germline genotypes for all  
127 discovery, validation, and control cohorts to enable ancestry inference. We used a trained  
128 random forest classifier to assign one of the five 1000 Genomes defined super populations  
129 (European, African, Admixed American, East Asian, and South Asian) to each sample in our  
130 case and control cohorts. Cases and controls were matched on genetic ancestry composition  
131 based on the first ten principal components from the preceding analysis (Supplemental  
132 Methods).

### 133 **Germline Variant Characterization**

134 We called germline variants with a deep learning method, DeepVariant, which has  
135 shown superior sensitivity and specificity compared with a joint genotyping-based approach  
136 (version 0.8.0)<sup>14,15</sup>. High-quality coding variants were utilized for subsequent analyses  
137 (Supplemental Methods).

### 138 **Gene Sets**

139 We evaluated the prevalence of pathogenic variants in a list of established germline  
140 cancer predisposition genes (n = 141; Table S3)<sup>16-19</sup>. A subset of these genes had an  
141 established role in DDR (n = 43). The low-penetrance founder *CHEK2* variant (p.Ile200Thr) was  
142 considered separately from other *CHEK2* pathogenic variants. We also evaluated predefined  
143 and non-mutually exclusive functional subsets of the DDR gene list for pathway-based  
144 enrichment analysis, curated through evaluation of known primary biological function in the  
145 Online Mendelian Inheritance in Man (OMIM)<sup>20</sup> and Reactome<sup>21</sup> databases: mismatch repair (n  
146 = 4), Fanconi Anemia (n = 16), double-strand break repair (n = 12), and nucleotide excision  
147 repair (n = 6).

### 148 **Germline Variant Pathogenicity Evaluation**

149 Based on ClinVar database and Variant Effect Predictor (VEP) consequence  
150 annotations, all detected germline variants in cancer predisposition genes were classified into  
151 five categories: benign, likely benign, variants of unknown significance, likely pathogenic, and

152 pathogenic using the American College of Medical Genetics (ACMG) guidelines<sup>22</sup>. Only putative  
153 loss-of-function, pathogenic, and likely pathogenic variants were included in this study (hereafter  
154 collectively referred to as pathogenic variants). Pathogenic variants were manually evaluated  
155 using the raw genomic data and the Integrative Genomics Viewer (IGV; Supplemental Methods;  
156 Tables S4, S5, and S6)<sup>23,24</sup>.

## 157 **Outcomes**

158 The primary outcomes included gene-level enrichment analysis of germline pathogenic  
159 variants in individuals with Ewing sarcoma compared to other pediatric sarcomas, validation of  
160 enrichment findings in Ewing sarcoma, and analysis of mechanisms of inheritance among  
161 germline pathogenic variants in Ewing sarcoma. The secondary outcomes included exploratory  
162 gene and pathway level enrichment analysis of germline pathogenic variants in DDR genes in  
163 Ewing sarcoma.

## 164 **Statistical Analysis**

165 Two-sided Fisher's exact tests were used to calculate the odds ratios, 95% confidence  
166 intervals (CIs), and P values of germline pathogenic variant enrichment in affected versus  
167 unaffected cohorts for each of the examined cancer predisposition genes.  $P < 0.05$  was the  
168 threshold for nominal enrichment signal. For the discovery cohort, the false discovery rate  
169 (FDR) was calculated using the Benjamini-Hochberg procedure;  $FDR < 0.05$  was used as the  
170 threshold for enrichment meeting multiple hypothesis testing criteria for validation in the  
171 absence of a secondary cohort (applied to the discovery cohort; Supplemental Methods).

172

## 173 **Results**

### 174 ***Study overview and characteristics of discovery and validation cohorts***

175 Our discovery cohort of 1138 primarily pediatric patients with sarcoma comprised  
176 osteosarcoma (436 cases), rhabdomyosarcoma (180 cases), Ewing sarcoma (222 cases), and  
177 other subtypes (300 cases; Figure 1A). The mean age of patients in the discovery cohort was

178 10.8 years (SD 5.5 years), and 52% of patients were male (Figure 1B). Our validation cohort  
179 comprised 433 patients with Ewing sarcoma; of these, 425 cases were available for an  
180 ancestry-matched case-control study, and 301 cases were available as parent-proband trios for  
181 evaluation for mechanisms of inheritance (Figure 1A). The mean age of patients in the Ewing  
182 sarcoma validation cohort was 13.3 years (SD 6.6 years), and 54% of patients were male  
183 (Figure 1C). The germline exome-wide mean target coverage for the discovery cohort samples  
184 was 53.9X (interquartile range [IQR] 37.6 – 66.3X), and for the Ewing sarcoma validation cohort  
185 samples was 27.3X (IQR 24.6 – 30.2X); exome-wide variant call rates were satisfactory for all  
186 samples (Figure S1). Differential coverage for evaluated genes was assessed, and overall  
187 comparable between cases and controls (Figure S2). All samples had satisfactory indel rates,  
188 variant transition-to-transversion rates, and genotype quality (Figure S3).

189

190 ***Pathogenic germline variants in cancer predisposition genes are enriched across***  
191 ***pediatric sarcoma histologic subtypes relative to cancer-free controls***

192 We assessed the frequency of pathogenic germline variants in 141 established cancer  
193 predisposition genes in our discovery cohort<sup>16–19</sup>. Our discovery cohort had broad representation  
194 from five major continental ancestries (Figure 2A; Figure S4); control cohorts for comparison  
195 were identically processed and ancestry-matched. The presence of pathogenic germline  
196 variants was not significantly associated with age (mean 10.9 vs. 10.5 years,  $p = 0.42$  by two-  
197 sided t-test) or sex ( $p = 0.81$  by Fisher's exact test). Across the pan-sarcoma discovery cohort,  
198 nominal enrichment signal at  $p < 0.05$  was observed for multiple genes previously implicated in  
199 sarcoma pathogenesis, including *TP53*, *NF1*, and *DICER1*<sup>5,18,25</sup>; nominal enrichment signal was  
200 also seen for *MUTYH*, *PALB2*, *NTHL1*, and *FANCC*, genes with less prior supporting evidence  
201 for their role in sarcoma germline predisposition. The enrichment in *TP53* was greatest,  
202 reaching significance at  $FDR < 0.05$  across the pan-sarcoma discovery cohort (Figure 2B; Table  
203 S7).



204 We next carried out ancestry-matched enrichment analyses for each of the three major  
205 sarcoma histologic subtypes. For osteosarcoma, nominal enrichment signal was observed for 5  
206 genes (Table S8). These included *TP53* and *RB1*, previously validated as important in germline  
207 predisposition to osteosarcoma (Figure 2C)<sup>26</sup>; once again, only *TP53* reached significance at  
208 FDR < 0.05. *RECQL* also had nominal enrichment signal in osteosarcoma cases relative to  
209 controls; however, due to relative underpowering, the previously implicated predisposition gene  
210 *RECQL4* did not, despite a higher absolute frequency in cases relative to controls (Figure S5).  
211 Nominal enrichment signal was also observed for *MUTYH* and *FANCM*, genes without  
212 substantial prior evidence supporting their role in germline predisposition to osteosarcoma<sup>27</sup>.

213 In rhabdomyosarcoma, nominal enrichment signal was observed for *TP53*, *NF1*, and  
214 *DICER1*, genes that have previously been implicated in germline predisposition to pediatric  
215 rhabdomyosarcoma<sup>28</sup>. We were able to redemonstrate a nominal enrichment signal for *BRCA2*  
216 and *CHEK2*, genes with a previous moderate level of evidence for a role in germline  
217 predisposition to rhabdomyosarcoma<sup>25,29-31</sup>. No genes reached significance at FDR < 0.05  
218 (Figure 2D; Table S9).

219 In Ewing sarcoma, the only gene with nominal enrichment signal was *FANCC*, with  
220 heterozygous pathogenic variants seen in 3 out of 222 cases (1.3%, OR 14.4, 95% CI 3.5 –  
221 51.2, p = 0.002, FDR = 0.28; Figure 2E; Figure S5; Table S10). Prior work had shown a general  
222 association between germline variants in Fanconi Anemia pathway genes and translocation-  
223 driven sarcomas, but the role of *FANCC* in germline predisposition to Ewing sarcoma had not  
224 previously been reported to our knowledge<sup>5</sup>. In contrast to osteosarcoma and  
225 rhabdomyosarcoma, no pathogenic germline *TP53* variants were observed in Ewing sarcoma.

226 Thus, our enrichment analysis of pathogenic variants in our discovery cohort  
227 demonstrated a unique pattern of predisposing variants across pediatric sarcoma subtypes, with  
228 a strong enrichment signal for *TP53* in all sarcoma subtypes except Ewing sarcoma. Having  
229 demonstrated a distinct enrichment pattern among Ewing sarcoma cases relative to

230 osteosarcoma and rhabdomyosarcoma, we proceeded to evaluate the enrichment signal in  
231 *FANCC* in our larger validation cohort of Ewing sarcoma cases.

232

233 ***FANCC and other DNA damage repair genes harbor pathogenic germline variants in***  
234 ***Ewing sarcoma***

235 Our validation cohort of Ewing sarcoma patients was also ancestry-matched to cancer-  
236 free controls to enable targeted evaluation of *FANCC* enrichment (Figure S6). Heterozygous  
237 pathogenic germline *FANCC* variants were again enriched, seen in 3 of 425 cases (0.7%, OR  
238 5.1, 95% CI 1.2 – 18.5,  $p = 0.03$ , single hypothesis; Figure 3A). The pooled odds ratio for  
239 *FANCC* enrichment between discovery and validation cohorts remained significant (6 of 647  
240 cases, 0.9%, OR 7.7, 95% CI 3.1 – 19.3,  $p < .0001$ ).

241 Prior mechanistic work has demonstrated that *FANCC* knockout contributes to  
242 rearrangement signatures consistent with homologous recombination deficiency<sup>32</sup>. We thus  
243 asked whether the recurrent enrichment of *FANCC* represented a broader importance of DDR  
244 genes in germline predisposition to Ewing sarcoma, as has been previously suggested<sup>6</sup>. We  
245 performed an exploratory analysis in the Ewing sarcoma validation cohort on the subset of 43  
246 cancer predisposition genes with specific DDR pathway roles. In aggregate, pathogenic variants  
247 in DNA double-strand break repair (DSB) genes (OR 1.8, 95% CI 1.1 – 3.0,  $p = 0.02$ ) and  
248 nucleotide excision repair genes (OR 2.8, 95% CI 1.2 – 5.9,  $p = 0.01$ ; Figure 3B, Table S11)  
249 were enriched. While the discovery Ewing sarcoma and rhabdomyosarcoma cohorts were  
250 underpowered for a comparative pathway analysis (Tables S12 and S13), the discovery  
251 osteosarcoma cohort was of comparable size. In aggregate, DDR genes were enriched in  
252 discovery osteosarcoma cases (OR 1.9, 95% CI 1.4 – 2.6,  $p = 0.0001$ , Figure S7); notably and  
253 in contrast to Ewing sarcoma, this was driven largely by germline *TP53* mutations, as the DSB  
254 and nucleotide excision repair pathways were not significantly enriched (Table S14). In the  
255 validation cohort of patients with Ewing sarcoma, the presence of pathogenic germline variants

256 in DDR genes was not significantly associated with age (mean 13.3 vs. 13.5 years,  $p = 0.88$  by  
257 two-sided t-test) or sex ( $p = 0.10$  by Fisher's exact test).

258 In evaluating the specific genes contributing to the collective enrichment of the DSB and  
259 nucleotide excision repair pathways, we found that *CHEK2*, *ERCC2*, and *ERCC4* had nominal  
260 enrichment signal at  $p < 0.05$  in our validation Ewing sarcoma cohort, although none of these  
261 individual genes reached significance at  $FDR < 0.05$  when correcting for 43 DDR genes (Table  
262 S15). In combination with *FANCC*, these four genes harbored germline pathogenic variants in  
263 16 of 425 Ewing sarcoma cases (3.8%), compared with 60 of 7259 controls (0.8%; Figure 3C).

264 Similar to our discovery Ewing sarcoma cohort, we once again identified no pathogenic  
265 germline *TP53* variants in our validation Ewing sarcoma cohort. The rate of pathogenic germline  
266 *TP53* variants in patients with Ewing sarcoma (0%) was significantly lower than that seen for all  
267 sarcomas in aggregate (1.6%,  $p = 0.006$  by Fisher's exact test), and osteosarcoma in particular  
268 (2.8%,  $p = 0.0005$  by Fisher's exact test; Figure 3D). This, in combination with the recurrent  
269 enrichment of pathogenic germline mutations in *FANCC*, as well as the collective enrichment of  
270 DSB and nucleotide excision repair pathways, demonstrated a distinct pattern of germline  
271 mutations in Ewing sarcoma relative to other pediatric sarcoma subtypes.

272

### 273 ***Pathogenic germline variants in DNA damage repair genes are inherited in high-risk*** 274 ***families***

275 Having identified pathogenic germline mutations in *FANCC* and other DDR genes in  
276 Ewing sarcoma, we next sought to assess inheritance of these variants. Thus, we evaluated the  
277 301 patients with Ewing sarcoma from our validation cohort that were part of parent-proband  
278 sequencing trios. Among these 301 patients, 32 harbored pathogenic germline variants in DDR  
279 genes (10.6%; Figure 4A). In 32 of 32 probands in which a pathogenic germline DDR variant  
280 was identified in a proband, the same germline DDR variant was identified in one of the parents  
281 (100%). In contrast, for probands in whom a pathogenic germline DDR variant was not

282 identified, only 19 of 269 had at least one parent with a germline DDR variant (7.1%; Figure 4B).  
283 Collectively, pathogenic variants in DSB repair genes were more common among parents of  
284 probands than ancestry-matched cancer-free controls (OR 1.8, 95% CI 1.2 – 2.7,  $p = 0.006$ ).  
285 While pathogenic germline variants in genes such as *BRCA2* and *CHEK2* were also observed in  
286 some parents and not inherited by probands, these were at a rate that was comparable to the  
287 population frequency (Figure S8).

288 Identical pathogenic germline DDR variants in probands and parents impacted *FANCC*,  
289 *ERCC2*, *CHEK2*, and *BRCA1* among other genes (Figure 4C). In three instances, heterozygous  
290 germline pathogenic variants affecting multiple DDR genes were seen in probands, with each  
291 variant also identified in a parent (Figure 4D).

292 We sought to understand whether as yet unidentified *de novo* pathogenic variants in  
293 other coding genes may coordinate with or complement the inherited DDR variants to explain a  
294 significant proportion of the unexplained germline risk for developing pediatric Ewing sarcoma.  
295 Based on prior frameworks<sup>33–35</sup>, we reasoned that finding pathogenic *de novo* variants  
296 recurrently impacting the same gene in a cohort of 301 proband-parent trios would be highly  
297 unlikely by chance, implicating potential additional candidate risk genes. However, in our cohort,  
298 we identified recurrent pathogenic *de novo* germline variants in only one gene, *TTN*, which  
299 occurred in two separate Ewing sarcoma cases. As the frequency of pathogenic germline  
300 variants in *TTN* between cases and cancer-free controls was not significantly different and there  
301 is no established biological role for *TTN* in Ewing sarcoma oncogenesis, there was insufficient  
302 evidence to support its role in germline predisposition to Ewing sarcoma (Figure S9).

303 Taken together, pathogenic germline variants in DSB genes were present more  
304 frequently in families of patients with Ewing sarcoma relative to cancer-free controls. Autosomal  
305 inheritance, as opposed to *de novo* development, was the mechanism of inheritance of these  
306 moderate penetrance risk variants.

307

## 308 Discussion

309 This study represents the largest and most systematic analysis of germline  
310 predisposition to Ewing sarcoma relative to other pediatric sarcoma subtypes to date. Having  
311 assembled germline sequencing data from 1138 patients with pediatric sarcoma diagnoses, we  
312 undertook rigorous ancestry-matched case-control analyses and illustrated distinct patterns of  
313 enrichment amongst pathogenic variants in Ewing sarcoma relative to osteosarcoma and  
314 rhabdomyosarcoma. Supporting the validity of our approach, we were able to recover  
315 enrichment signal in many cancer predisposition genes known to be associated with pediatric  
316 sarcoma risk, such as *TP53*, *RB1*, and *DICER1*. We additionally demonstrated enrichment  
317 signal in several cancer predisposition genes with less well-characterized links to pediatric  
318 sarcoma, most notably *FANCC* in Ewing sarcoma. We then validated the enrichment of  
319 pathogenic germline variants in *FANCC* among patients with Ewing sarcoma using an  
320 independent cohort of 425 unique patients. This recurrent enrichment of heterozygous  
321 pathogenic germline variants in *FANCC* provides evidence for its role in increasing risk for some  
322 cases of Ewing sarcoma, and raises the possibility that monoallelic germline variants in Fanconi  
323 anemia genes may confer increased risk in other translocation-associated cancers.

324 We demonstrated that the enrichment in *FANCC* pathogenic germline variants  
325 represented a broader importance of DNA damage repair (DDR) genes, and both the DNA  
326 double-strand break (DSB) and nucleotide excision repair pathways in particular, for Ewing  
327 sarcoma germline predisposition. While prior studies have identified occasional instances of  
328 pathogenic germline *TP53* variants amongst cases of Ewing sarcoma, through comparative  
329 analyses, we found that the frequency of pathogenic germline *TP53* variants among cases of  
330 Ewing sarcoma was significantly lower in relation to other pediatric sarcoma subtypes<sup>6,29</sup>. This  
331 finding is supported by the clinical observation that Ewing sarcoma is not frequently seen in  
332 families with Li-Fraumeni syndrome<sup>36</sup>.

333 Using parent-proband trios, we showed that pathogenic germline variants in DNA  
334 damage repair genes found in patients with Ewing sarcoma are also present in their parents,  
335 and therefore passed on through autosomal inheritance. We found pathogenic germline variants  
336 in DSB genes enriched amongst parents of patients with Ewing sarcoma. As moderate  
337 penetrance risk variants that are also present in parents, we reasoned that pathogenic germline  
338 variants in DDR genes play a substantial role in increasing risk for developing Ewing sarcoma,  
339 but are likely not sufficient to cause the disease in isolation. However, we did not identify *de*  
340 *novo* variants recurrently impacting other genes to support a role for their interaction with  
341 pathogenic germline variants in DDR genes to promote germline predisposition to Ewing  
342 sarcoma.

343 Our study had some notable limitations. While pathogenic germline variants in *FANCC*  
344 occurred at a rate greater than expected by chance in cases of Ewing sarcoma, the overall  
345 frequency of these variants was low (1.3% in the discovery cohort, 0.7% in the validation  
346 cohort), supporting the role of *FANCC* as a moderate penetrance cancer predisposition gene as  
347 opposed to the sole driver of disease pathogenesis. Additionally, our focus on germline variants  
348 in select DDR genes within Ewing sarcoma likely underestimated the total contribution of rare  
349 coding pathogenic germline variants to Ewing sarcoma pathogenesis. Finally, similar to much  
350 preceding work in germline predisposition in pediatric cancers, our methods were limited to  
351 identifying known pathogenic germline SNVs/ indels conferring increased risk in pediatric  
352 sarcoma. As progress is made in germline structural variant discovery<sup>37</sup> and placing rare  
353 pathogenic variants in the context of complex germline interactions<sup>38-41</sup>, future studies and new  
354 statistical frameworks will be needed to more completely define the role of germline  
355 predisposition in Ewing sarcoma pathogenesis.

356 Taken together, our analysis supports a unique contribution of germline variants in  
357 *FANCC* and other DDR genes to Ewing sarcoma pathogenesis. Our study provides a

358 foundation to inform approaches to genetic testing for patients with Ewing sarcoma, as well as  
359 cascade testing for family members.

360

### 361 **Acknowledgments**

362 This work was supported by a Research Training Grant in Pediatric Oncology NIH  
363 5T32CA136432-12 (R.G.), American Society of Clinical Oncology Conquer Cancer – Sarcoma  
364 Foundation of America Young Investigator Award (R.G.), Jay Vernon Jackson Memorial  
365 Research Award from Sarcoma Foundation of America (R.G.), Edward B. Clark, MD Endowed  
366 Chair in Pediatric Research (J.D.S.), Helen Clise Presidential Endowed Chair in Li-Fraumeni  
367 Syndrome Research (J.D.S.), Conquer Cancer Foundation Career Development Award 13167  
368 from the American Society of Clinical Oncology (S.H.A.), Young Investigator Award 18YOUN02  
369 from the Prostate Cancer Foundation (S.H.A.), Physician Research Award  
370 (PC200150/W81XWH-21-1-0084) of the Department of Defense (S.H.A), NIH R37 CA222574  
371 (E.M.V.A.), R01 CA227388 (E.M.V.A.), U01 CA233100 (E.M.V.A.), Innovation in Cancer  
372 Informatics Award (E.M.V.A.), COG Biospecimen Bank Grant U24CA196173, NCTN Operations  
373 Center Grant U10CA180886, NCTN Statistics & Data Center Grant U10CA180899, and  
374 Gabriella Miller Kids First 1X01 HL 140547-01.

375

### 376 **Declaration of interests**

377 R.G. has equity in Google, Microsoft, Amazon, Moderna, Pfizer, and Vertex  
378 Pharmaceuticals. E.M.V.A. holds consulting roles with Tango Therapeutics, Invitae, Genome  
379 Medical, Enara Bio, Janssen, and Manifold Bio; he receives research support from Bristol-Myers  
380 Squibb and Novartis; he has equity in Tango Therapeutics, Genome Medical, Syapse, Enara  
381 Bio, Manifold Bio, and Microsoft; he has received travel reimbursement from Roche and  
382 Genentech; and he has filed institutional patents on chromatin mutations, immunotherapy  
383 response, and methods for clinical interpretation. Other authors have no relevant disclosures.

384

## 385 **Data and code availability**

386           Sequencing data analyzed in this study were obtained from multiple publicly accessible  
387 data repositories. Sequenced samples from the discovery cohort came from four data sources:  
388 St. Jude Cloud (Pediatric Cancer Genome Project, St. Jude Lifetime, Genomes for Kids, and  
389 Childhood Cancer Survivor Study; n = 1033)<sup>42-46</sup>, dbGaP study “Genomic Sequencing of Ewing  
390 Sarcoma” (phs000804.v1.p1; n = 26)<sup>47,48</sup>, dbGaP study “Osteosarcoma Genomics”  
391 (phs000699.v1.p1, n = 58)<sup>49</sup>, and ICGC study “Bone Cancer – UK” (BOCA-UK, n = 63)<sup>50</sup>.  
392 Sequenced samples from the Ewing sarcoma validation and trio cohorts were from the Gabriella  
393 Miller Kids First “Ewing Sarcoma – Genetic Risk” study (phs001228.v1.p1)<sup>51</sup>. The control  
394 cohorts came from the following sources: Autism Sequencing Consortium (dbGaP phs000298),  
395 Framingham Cohort (dbGaP phs000007), Multi-Ethnic Study of Atherosclerosis (dbGaP  
396 phs000209), Lung Cohort (dbGaP phs000291), in-house collection of exomes from National  
397 Heart, Lung, and Blood Institute “Grand Opportunity” Exome Sequencing Project (NHLBI GO-  
398 ESP), and the 1000 Genomes Project<sup>52</sup>.

399

## 400 **Supplemental data**

401           Supplemental data includes supplemental methods, 9 supplemental figures, and 15  
402 supplemental tables.

403

## 404 **Author contributions**

405           R.G., E.M.V.A., and S.H.A. conceived the project design, carried out the analysis, and  
406 wrote the manuscript. B.D.C. and K.A.J. contributed to refinement of the project design, data  
407 interpretation, validation of findings, and manuscript review. S.Y.C., S.A., and J.K.J. provided  
408 support with data analysis, data interpretation, and manuscript review. J.D.C. contributed to  
409 validation of findings, data interpretation, and manuscript review. E.Y., S.O., L.H., G.M., and



410 T.F. carried out foundational work that enabled validation of findings. J.K. and A.G. contributed  
411 to data interpretation and manuscript review.

412

### 413 **Disclaimer**

414 The content is solely the responsibility of the authors and does not necessarily represent  
415 the official views of the National Institutes of Health.

416

### 417 **References**

- 418 1. Grünewald, T.G.P., Cidre-Aranaz, F., Surdez, D., Tomazou, E.M., De Álava, E., Kovar, H.,  
419 Sorensen, P.H., Delattre, O., and Dirksen, U. (2018). Ewing sarcoma. *Nat. Rev. Dis. Prim.* *4*,.
- 420 2. Balamuth, N.J., and Womer, R.B. (2010). Ewing's sarcoma. *Lancet Oncol.* *11*, 184–192.
- 421 3. Brohl, A.S., Solomon, D.A., Chang, W., Wang, J., Song, Y., Sindiri, S., Patidar, R., Hurd, L.,  
422 Chen, L., Shern, J.F., et al. (2014). The Genomic Landscape of the Ewing Sarcoma Family of  
423 Tumors Reveals Recurrent STAG2 Mutation. *10*,.
- 424 4. Anderson, N.D., De Borja, R., Young, M.D., Fuligni, F., Rosic, A., Roberts, N.D., Hajjar, S.,  
425 Layeghifard, M., Novokmet, A., Kowalski, P.E., et al. (2018). Rearrangement bursts generate  
426 canonical gene fusions in bone and soft tissue tumors. *Science (80-. )*. *361*,.
- 427 5. Ballinger, M.L., Goode, D.L., Ray-Coquard, I., James, P.A., Mitchell, G., Niedermayr, E., Puri,  
428 A., Schiffman, J.D., Dite, G.S., Cipponi, A., et al. (2016). Monogenic and polygenic determinants  
429 of sarcoma risk: an international genetic study. *Lancet Oncol.* *17*, 1261–1271.
- 430 6. Brohl, A.S., Patidar, R., Turner, C.E., Wen, X., Song, Y.K., Wei, J.S., Calzone, K.A., and  
431 Khan, J. (2017). Frequent inactivating germline mutations in DNA repair genes in patients with  
432 Ewing sarcoma. *Genet. Med.* *19*, 955–958.
- 433 7. Grünewald, T.G.P., Bernard, V., Gilardi-Hebenstreit, P., Raynal, V., Surdez, D., Aynaud,  
434 M.M., Mirabeau, O., Cidre-Aranaz, F., Tirode, F., Zaidi, S., et al. (2015). Chimeric EWSR1-FLI1  
435 regulates the Ewing sarcoma susceptibility gene EGR2 via a GGAA microsatellite. *Nat. Genet.*

- 436 47, 1073–1078.
- 437 8. Postel-Vinay, S., Véron, A.S., Tirode, F., Pierron, G., Reynaud, S., Kovar, H., Oberlin, O.,  
438 Lapouble, E., Ballet, S., Lucchesi, C., et al. (2012). Common variants near TARDBP and EGR2  
439 are associated with susceptibility to Ewing sarcoma. *Nat. Genet.* *44*, 323–327.
- 440 9. Machiela, M.J., Grünewald, T.G.P., Surdez, D., Reynaud, S., Mirabeau, O., Karlins, E.,  
441 Rubio, R.A., Zaidi, S., Grossetete-Lalami, S., Ballet, S., et al. (2018). Genome-wide association  
442 study identifies multiple new loci associated with Ewing sarcoma susceptibility. *Nat. Commun.* *9*,  
443 1–8.
- 444 10. Kratz, C.P., Achatz, M.I., Brugieres, L., Frebourg, T., Garber, J.E., Greer, M.L.C., Hansford,  
445 J.R., Janeway, K.A., Kohlmann, W.K., McGee, R., et al. (2017). Cancer screening  
446 recommendations for individuals with Li-Fraumeni syndrome. *Clin. Cancer Res.* *23*, e38–e45.
- 447 11. Schultz, K.A.P., Williams, G.M., Kamihara, J., Stewart, D.R., Harris, A.K., Bauer, A.J.,  
448 Turner, J., Shah, R., Schneider, K., Schneider, K.W., et al. (2018). Dicer1 and associated  
449 conditions: Identification of at-risk individuals and recommended surveillance strategies. *Clin.*  
450 *Cancer Res.* *24*, 2251–2261.
- 451 12. Joyce, M.J., Harmon, D.C., Mankin, H.J., Suit, H.D., Schiller, A.L., and Truman, J.T. (1984).  
452 Ewing's sarcoma in female siblings: A clinical report and review of the literature. *Cancer* *53*,  
453 1959–1962.
- 454 13. Kuhlen, M., Taeubner, J., Brozou, T., Wiczorek, D., Siebert, R., and Borkhardt, A. (2019).  
455 Family-based germline sequencing in children with cancer. *Oncogene* *38*, 1367–1380.
- 456 14. Poplin, R., Chang, P.C., Alexander, D., Schwartz, S., Colthurst, T., Ku, A., Newburger, D.,  
457 Dijamco, J., Nguyen, N., Afshar, P.T., et al. (2018). A universal snp and small-indel variant  
458 caller using deep neural networks. *Nat. Biotechnol.* *36*, 983.
- 459 15. AlDubayan, S.H., Conway, J.R., Camp, S.Y., Witkowski, L., Kofman, E., Reardon, B., Han,  
460 S., Moore, N., Elmarakeby, H., Salari, K., et al. (2020). Detection of pathogenic variants with  
461 germline genetic testing using deep learning vs standard methods in patients with prostate

- 462 cancer and melanoma. *JAMA - J. Am. Med. Assoc.* 324, 1957–1969.
- 463 16. Rahman, N. (2014). Realizing the promise of cancer predisposition genes. *Nature* 505, 302–  
464 308.
- 465 17. Huang, K. lin, Mashl, R.J., Wu, Y., Ritter, D.I., Wang, J., Oh, C., Paczkowska, M., Reynolds,  
466 S., Wyczalkowski, M.A., Oak, N., et al. (2018). Pathogenic Germline Variants in 10,389 Adult  
467 Cancers. *Cell* 173, 355-370.e14.
- 468 18. Mirabello, L., Zhu, B., Koster, R., Karlins, E., Dean, M., Yeager, M., Gianferante, M.,  
469 Spector, L.G., Morton, L.M., Karyadi, D., et al. (2020). Frequency of Pathogenic Germline  
470 Variants in Cancer-Susceptibility Genes in Patients with Osteosarcoma. *JAMA Oncol.* 6, 724–  
471 734.
- 472 19. Tate, J.G., Bamford, S., Jubb, H.C., Sondka, Z., Beare, D.M., Bindal, N., Boutselakis, H.,  
473 Cole, C.G., Creatore, C., Dawson, E., et al. (2019). COSMIC: The Catalogue Of Somatic  
474 Mutations In Cancer. *Nucleic Acids Res.* 47, D941–D947.
- 475 20. Amberger, J.S., Bocchini, C.A., Schiettecatte, F., Scott, A.F., and Hamosh, A. (2015).  
476 OMIM.org: Online Mendelian Inheritance in Man (OMIM®), an Online catalog of human genes  
477 and genetic disorders. *Nucleic Acids Res.* 43, D789–D798.
- 478 21. Jassal, B., Matthews, L., Viteri, G., Gong, C., Lorente, P., Fabregat, A., Sidiropoulos, K.,  
479 Cook, J., Gillespie, M., Haw, R., et al. (2020). The reactome pathway knowledgebase. *Nucleic*  
480 *Acids Res.* 48, D498–D503.
- 481 22. Richards, S., Aziz, N., Bale, S., Bick, D., Das, S., Gastier-Foster, J., Grody, W.W., Hegde,  
482 M., Lyon, E., Spector, E., et al. (2015). Standards and guidelines for the interpretation of  
483 sequence variants: A joint consensus recommendation of the American College of Medical  
484 Genetics and Genomics and the Association for Molecular Pathology. *Genet. Med.* 17, 405–  
485 424.
- 486 23. Robinson, J.T., Thorvaldsdóttir, H., Winckler, W., Guttman, M., Lander, E.S., Getz, G., and  
487 Mesirov, J.P. (2011). Integrative genomics viewer. *Nat. Biotechnol.* 29, 24–26.

- 488 24. Robinson, J.T., Thorvaldsdóttir, H., Wenger, A.M., Zehir, A., and Mesirov, J.P. (2017).  
489 Variant review with the integrative genomics viewer. *Cancer Res.* 77, e31–e34.
- 490 25. Li, H., Sisoudiya, S.D., Martin-Giacalone, B.A., Khayat, M.M., Dugan-Perez, S., Marquez-  
491 Do, D.A., Scheurer, M.E., Muzny, D., Boerwinkle, E., Gibbs, R.A., et al. (2020). Germline  
492 Cancer Predisposition Variants in Pediatric Rhabdomyosarcoma: A Report From the Children’s  
493 Oncology Group . *JNCI J. Natl. Cancer Inst.* 00, 1–9.
- 494 26. Gianferante, D.M., Mirabello, L., and Savage, S.A. (2017). Germline and somatic genetics of  
495 osteosarcoma - Connecting aetiology, biology and therapy. *Nat. Rev. Endocrinol.* 13, 480–491.
- 496 27. Mirabello, L., Yu, K., Berndt, S.I., Burdett, L., Wang, Z., Chowdhury, S., Teshome, K.,  
497 Uzoka, A., Hutchinson, A., Grotmol, T., et al. (2011). A comprehensive candidate gene  
498 approach identifies genetic variation associated with osteosarcoma. *BMC Cancer* 11,.  
499 28. Martin-Giacalone, B.A., Weinstein, P.A., Plon, S.E., and Lupo, P.J. (2021). Pediatric  
500 Rhabdomyosarcoma: Epidemiology and Genetic Susceptibility. *J. Clin. Med.* 10, 2028.
- 501 29. Zhang, J., Walsh, M.F., Wu, G., Edmonson, M.N., Gruber, T.A., Easton, J., Hedges, D., Ma,  
502 X., Zhou, X., Yergeau, D.A., et al. (2015). Germline mutations in predisposition genes in  
503 pediatric cancer. *N. Engl. J. Med.* 373, 2336–2346.
- 504 30. Kim, J., Light, N., Subasri, V., Young, E.L., Wegman-Ostrosky, T., Barkauskas, D.A., Hall,  
505 D., Lupo, P.J., Patidar, R., Maese, L.D., et al. (2021). Pathogenic Germline Variants in Cancer  
506 Susceptibility Genes in Children and Young Adults With Rhabdomyosarcoma. *JCO Precis.*  
507 *Oncol.* 75–87.
- 508 31. Naslund-Koch, C., Nordestgaard, B.G., and Bojesen, S.E. (2016). Increased risk for other  
509 cancers in addition to breast cancer for CHEK2\*1100delC heterozygotes estimated from the  
510 copenhagen general population study. *J. Clin. Oncol.* 34, 1208–1216.
- 511 32. Zou, X., Owusu, M., Harris, R., Jackson, S.P., Loizou, J.I., and Nik-Zainal, S. (2018).  
512 Validating the concept of mutational signatures with isogenic cell models. *Nat. Commun.* 9, 1–  
513 16.

- 514 33. Ba, W., Yan, Y., Reijnders, M.R.F., Schuurs-Hoeijmakers, J.H.M., Feenstra, I., Bongers,  
515 E.M.H.F., Bosch, D.G.M., De Leeuw, N., Pfundt, R., Gilissen, C., et al. (2016). TRIO loss of  
516 function is associated with mild intellectual disability and affects dendritic branching and  
517 synapse function. *Hum. Mol. Genet.* 25, 892–902.
- 518 34. Jin, Z.B., Wu, J., Huang, X.F., Feng, C.Y., Cai, X.B., Mao, J.Y., Xiang, L., Wu, K.C., Xiao,  
519 X., Kloss, B.A., et al. (2017). Trio-based exome sequencing arrests de novo mutations in early-  
520 onset high myopia. *Proc. Natl. Acad. Sci. U. S. A.* 114, 4219–4224.
- 521 35. Samocha, K.E., Robinson, E.B., Sanders, S.J., Stevens, C., Sabo, A., McGrath, L.M.,  
522 Kosmicki, J.A., Rehnström, K., Mallick, S., Kirby, A., et al. (2014). A framework for the  
523 interpretation of de novo mutation in human disease. *Nat. Genet.* 46, 944–950.
- 524 36. Kratz, C.P., Freycon, C., Maxwell, K.N., Nichols, K.E., Schiffman, J.D., Evans, D.G., Achatz,  
525 M.I., Savage, S.A., Weitzel, J.N., Garber, J.E., et al. (2021). Analysis of the Li-Fraumeni  
526 Spectrum Based on an International Germline TP53 Variant Data Set: An International Agency  
527 for Research on Cancer TP53 Database Analysis. *JAMA Oncol.*
- 528 37. Collins, R.L., Brand, H., Karczewski, K.J., Zhao, X., Alföldi, J., Francioli, L.C., Khera, A. V.,  
529 Lowther, C., Gauthier, L.D., Wang, H., et al. (2020). A structural variation reference for medical  
530 and population genetics. *Nature* 581, 444–451.
- 531 38. Fahed, A.C., Wang, M., Homburger, J.R., Patel, A.P., Bick, A.G., Neben, C.L., Lai, C.,  
532 Brockman, D., Philippakis, A., Ellinor, P.T., et al. (2020). Polygenic background modifies  
533 penetrance of monogenic variants for tier 1 genomic conditions. *Nat. Commun.* 11, 1–9.
- 534 39. Wand, H., Lambert, S.A., Tamburro, C., Iacocca, M.A., O’Sullivan, J.W., Sillari, C., Kullo,  
535 I.J., Rowley, R., Dron, J.S., Brockman, D., et al. (2021). Improving reporting standards for  
536 polygenic scores in risk prediction studies. *Nature* 591, 211–219.
- 537 40. Sud, A., Turnbull, C., and Houlston, R. (2021). Will polygenic risk scores for cancer ever be  
538 clinically useful? *Npj Precis. Oncol.* 5, 1–5.
- 539 41. Seplyarskiy, V.B., Soldatov, R.A., Koch, E., McGinty, R.J., Goldmann, J.M., Hernandez,

540 R.D., Barnes, K., Correa, A., Burchard, E.G., Ellinor, P.T., et al. (2021). Population sequencing  
541 data reveal a compendium of mutational processes in the human germ line. *Science* (80-. ).  
542 eaba7408.

543 42. McLeod, C., Gout, A.M., Zhou, X., Thrasher, A., Rahbarinia, D., Brady, S.W., Macias, M.,  
544 Birch, K., Finkelstein, D., Sunny, J., et al. (2021). St. Jude cloud: A pediatric cancer genomic  
545 data-sharing ecosystem. *Cancer Discov.* *11*, 1082–1099.

546 43. Chen, X., Stewart, E., Shelat, A.A., Qu, C., Bahrami, A., Hatley, M., Wu, G., Bradley, C.,  
547 McEvoy, J., Pappo, A., et al. (2013). Targeting Oxidative Stress in Embryonal  
548 Rhabdomyosarcoma. *Cancer Cell* *24*, 710–724.

549 44. Downing, J.R., Wilson, R.K., Zhang, J., Mardis, E.R., Pui, C.H., Ding, L., Ley, T.J., and  
550 Evans, W.E. (2012). The pediatric cancer genome project. *Nat. Genet.* *44*, 619–622.

551 45. Wang, Z., Wilson, C.L., Easton, J., Thrasher, A., Mulder, H., Liu, Q., Hedges, D.J., Wang,  
552 S., Rusch, M.C., Edmonson, M.N., et al. (2018). Genetic risk for subsequent neoplasms among  
553 long-term survivors of childhood cancer. *J. Clin. Oncol.* *36*, 2078–2087.

554 46. Robison, L.L., Mertens, A.C., Boice, J.D., Breslow, N.E., Donaldson, S.S., Green, D.M., Li,  
555 F.P., Meadows, A.T., Mulvihill, J.J., Neglia, J.P., et al. (2002). Study design and cohort  
556 characteristics of the Childhood Cancer Survivor Study: A multi-institutional collaborative  
557 project. *Med. Pediatr. Oncol.* *38*, 229–239.

558 47. Mailman, M.D., Feolo, M., Jin, Y., Kimura, M., Tryka, K., Bagoutdinov, R., Hao, L., Kiang, A.,  
559 Paschall, J., Phan, L., et al. (2007). The NCBI dbGaP database of genotypes and phenotypes.  
560 *Nat. Genet.* *39*, 1181–1186.

561 48. Crompton, B.D., Stewart, C., Taylor-Weiner, A., Alexe, G., Kurek, K.C., Calicchio, M.L.,  
562 Kiezun, A., Carter, S.L., Shukla, S.A., Mehta, S.S., et al. (2014). The Genomic Landscape of  
563 Pediatric Ewing Sarcoma. *Cancer Discov.* *4*, 1326 LP – 1341.

564 49. Perry, J.A., Kiezun, A., Tonzi, P., Van Allen, E.M., Carter, S.L., Baca, S.C., Cowley, G.S.,  
565 Bhatt, A.S., Rheinbay, E., Peadamallu, C.S., et al. (2014). Complementary genomic approaches

566 highlight the PI3K/mTOR pathway as a common vulnerability in osteosarcoma. Proc. Natl.  
567 Acad. Sci. 201419260.  
568 50. Zhang, J., Bajari, R., Andric, D., Gerthoffert, F., Lepsa, A., Nahal-Bose, H., Stein, L.D., and  
569 Ferretti, V. (2019). The International Cancer Genome Consortium Data Portal. Nat. Biotechnol.  
570 37, 367–369.  
571 51. Heath, A.P., Taylor, D.M., Zhu, Y., Raman, P., Lilly, J., Storm, P., Waanders, A.J., Ferretti,  
572 V., Yung, C., Mattioni, M., et al. (2019). Abstract 2464: Gabriella Miller Kids First Data Resource  
573 Center: Harmonizing clinical and genomic data to support childhood cancer and structural birth  
574 defect research. Cancer Res. 79, 2464 LP – 2464.  
575 52. Auton, A., Abecasis, G.R., Altshuler, D.M., Durbin, R.M., Bentley, D.R., Chakravarti, A.,  
576 Clark, A.G., Donnelly, P., Eichler, E.E., Flicek, P., et al. (2015). A global reference for human  
577 genetic variation. Nature 526, 68–74.

578

## 579 **Figure Legends**

580 **Figure 1: Study overview and characteristics of discovery and validation cohorts.** A,  
581 Study schematic overview. The discovery cohort comprised 1138 cases, and the enrichment of  
582 pathogenic germline variants across 141 established cancer predisposition genes was  
583 evaluated. Ancestry-matched case-control analyses were carried out across the pan-sarcoma  
584 cohort (1138 cases), as well as major sarcoma histologic subtypes: osteosarcoma (436 cases),  
585 rhabdomyosarcoma (180 cases), Ewing sarcoma (222 cases). The validation cohort comprised  
586 433 cases of Ewing sarcoma. The enrichment of pathogenic germline variants in 43 DNA  
587 damage repair genes was evaluated employing an ancestry-matched case-control analysis.  
588 Mechanisms of inheritance were evaluated for 301 cases available as parent-proband trios. B,  
589 Discovery cohort demographics: mean age 10.8 years, 52% male. C, Ewing sarcoma validation  
590 cohort demographics: mean age 13.3 years, 54% male.

591 **Figure 2: Ancestry composition of discovery cohort. Enrichment of pathogenic germline**  
592 **variants in discovery cohort, across and within major histologic subtypes.** A, Ancestry  
593 composition of discovery cohort: 789 European cases (EUR), 136 African cases (AFR), 104  
594 South Asian cases (SAS), 102 Admixed American cases (AMR), 7 East Asian cases (EAS). B –  
595 D, Odds ratios and 95% confidence intervals for enrichment of pathogenic germline variants  
596 among cancer predisposition genes. Red: Significant at FDR < 0.05 after Benjamini-Hochberg  
597 procedure. Gray: Significant at  $p < 0.05$ , but does not meet FDR < 0.05. Genes with  $p > 0.05$   
598 are not displayed. B, Pan-sarcoma cohort (1138 cases, 5690 controls). C, Osteosarcoma  
599 subset of cohort (436 cases, 3488 controls). D, Rhabdomyosarcoma subset of cohort (180  
600 cases, 8280 controls). E, Ewing sarcoma subset of cohort (222 cases, 12654 controls).

601 **Figure 3: Enrichment of pathogenic germline variants in *FANCC* and other DNA damage**  
602 **repair genes in Ewing sarcoma validation cohort.** A, Enrichment of pathogenic germline  
603 variants in *FANCC* in the Ewing Sarcoma validation cohort vs. controls (OR 5.1, 95% CI 1.2 –  
604 18.5). B, Enrichment of pathogenic germline variants in DNA damage response genes and  
605 specific pathways (Red: Significant at  $p < 0.05$ ; Gray: Not significant): 43 DNA damage  
606 response genes (All DDR; OR 1.4, 95% CI 1.0 – 1.9,  $p = 0.05$ ), 12 genes involved in DNA  
607 double-strand break repair (DSB repair; OR 1.8, 95% CI 1.1 – 3.0,  $p = 0.02$ ), 6 genes involved  
608 in nucleotide excision repair (OR 2.8, 95% CI 1.2 – 5.9,  $p = 0.01$ ), 16 genes involved in Fanconi  
609 anemia pathway (OR 1.4, 95% CI 0.8 – 2.3,  $p = 0.28$ ), 4 genes involved in mismatch repair  
610 (MMR; OR 0.5, 95% CI 0 – 3.2,  $p = 1.0$ ). C, Collective frequency of the 4 genes with enrichment  
611 signal at  $p < 0.05$  (*CHEK2*, *ERCC2*, *ERCC4*, and *FANCC*) in Ewing sarcoma cases vs. controls.  
612 D, Rates of pathogenic variants in *TP53* in Ewing sarcoma validation cohort in comparison to  
613 Ewing sarcoma subset of discovery cohort, rhabdomyosarcoma subset of discovery cohort,  
614 osteosarcoma subset of discovery cohort, and pan-sarcoma discovery cohort (Fisher's exact  
615 tests, n.s. denotes no significant difference, \*\*\* denotes significant difference at  $p < 0.05$ ).



616 **Figure 4: Pathogenic germline variants in DNA damage repair genes are inherited in high-**  
617 **risk families.** A, Pathogenic germline variants in DDR genes among trio probands with Ewing  
618 sarcoma. 35 pathogenic variants impacting 32 of 301 patients with Ewing sarcoma were  
619 identified. B, 32 of 32 probands (100%) with pathogenic germline variants in DDR genes had  
620 identical variants identified in parents. 19 of 269 probands without a pathogenic germline variant  
621 in a DDR gene had at least one parent with a germline DDR variant that was not inherited by  
622 the proband (7.1%). C – D, Pedigrees and IGV screenshots of pathogenic variants in DDR  
623 genes. Pedigree legend: circle = female sex, square = male sex, diamond = unknown sex, gray  
624 shading = proband with Ewing sarcoma, \* denotes variant 1 identified in parent-proband trio, ‡  
625 denotes variant 2 identified in parent-proband trio. Top screenshot: Carrier Parent, Bottom  
626 screenshot: Proband.  
627

# Figure 1

a)

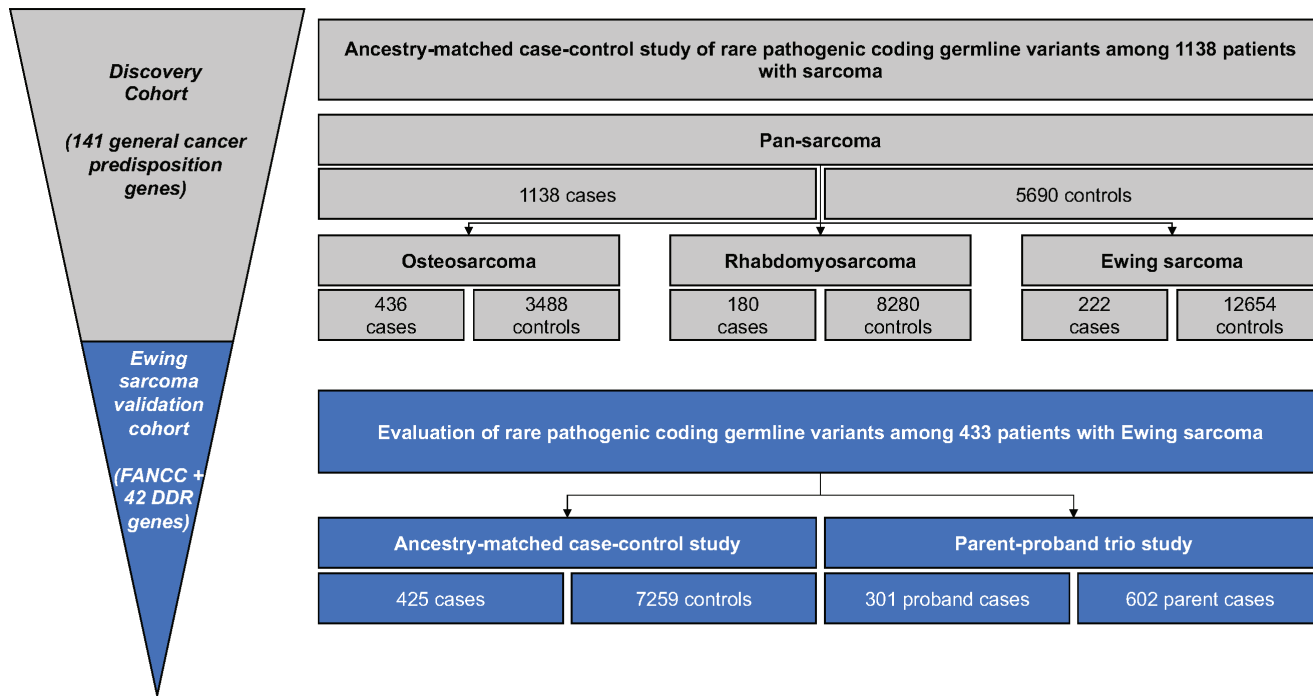

b)

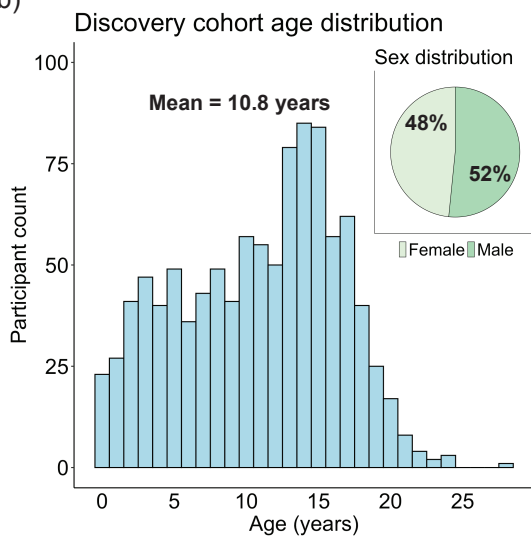

c)

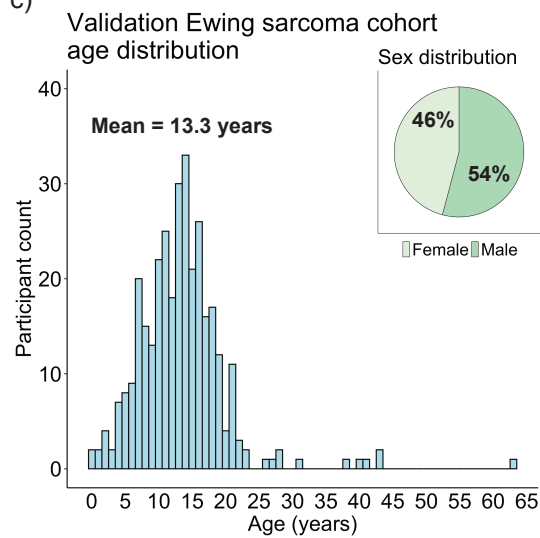

## Figure 2

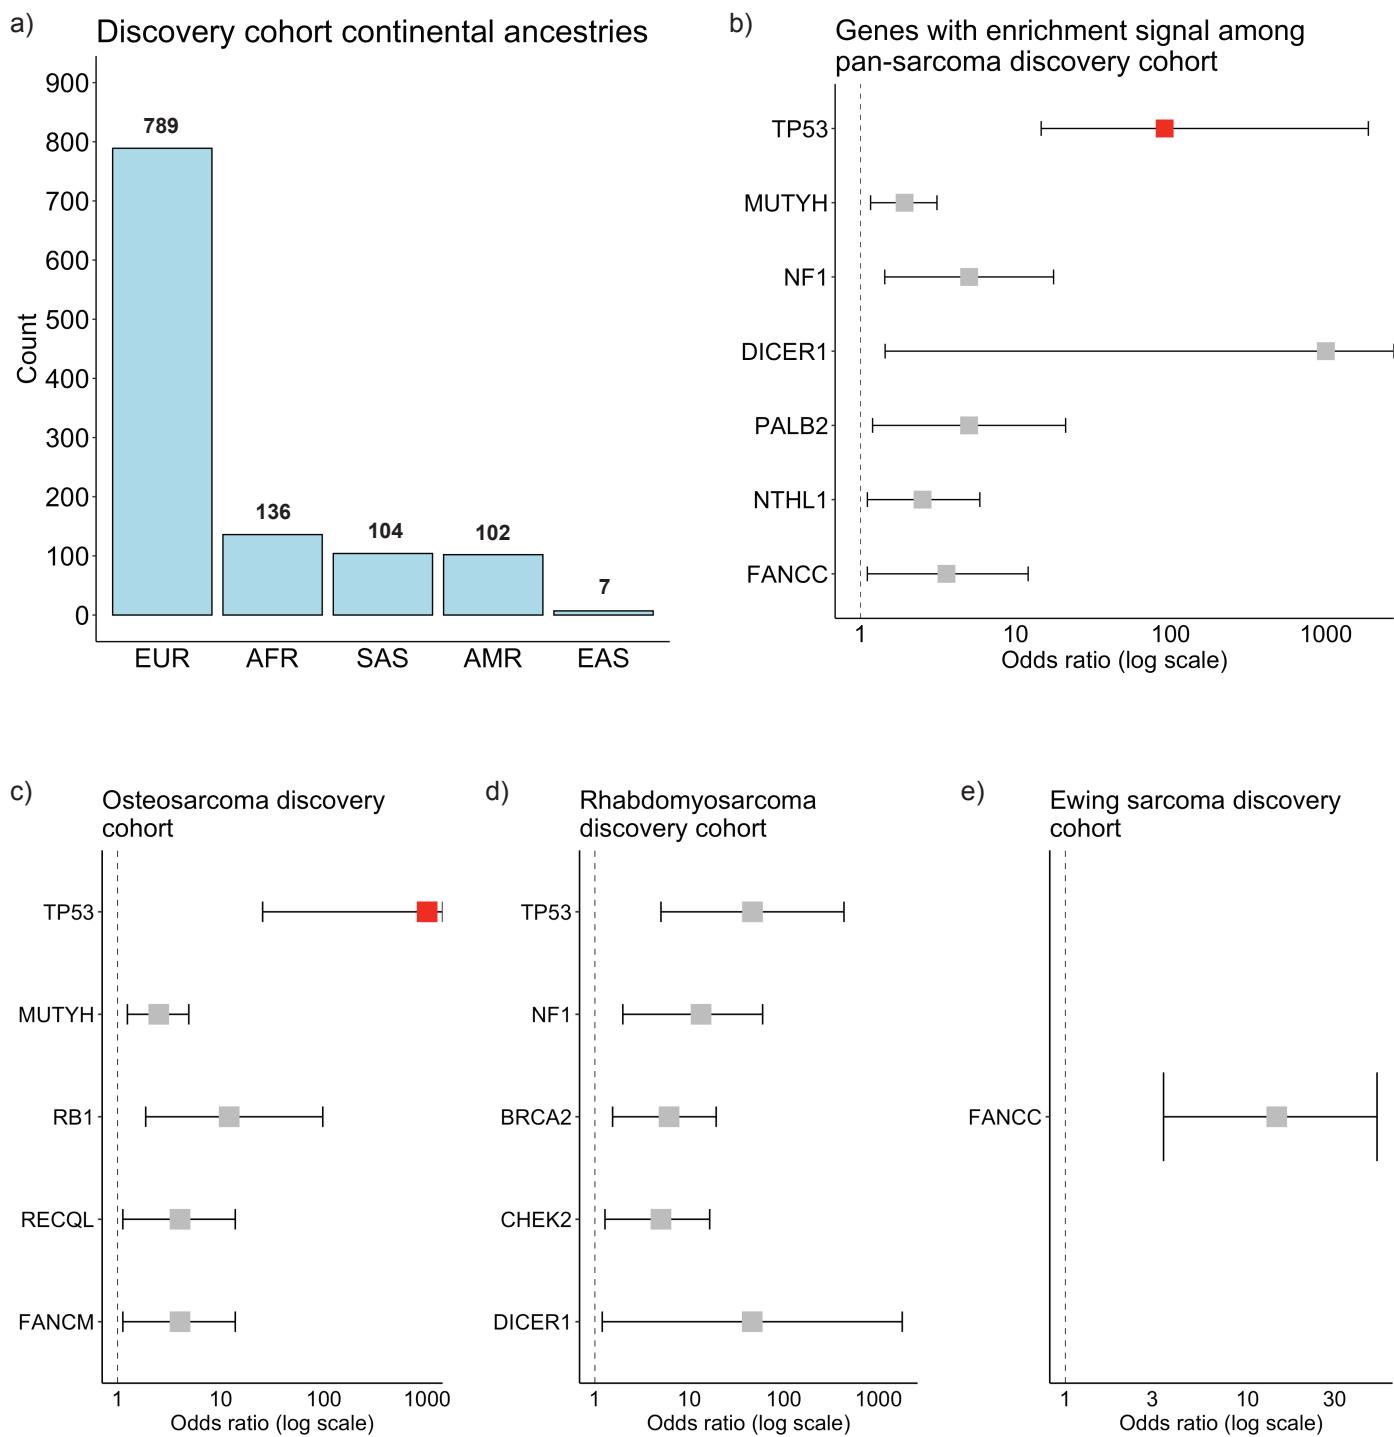

# Figure 3

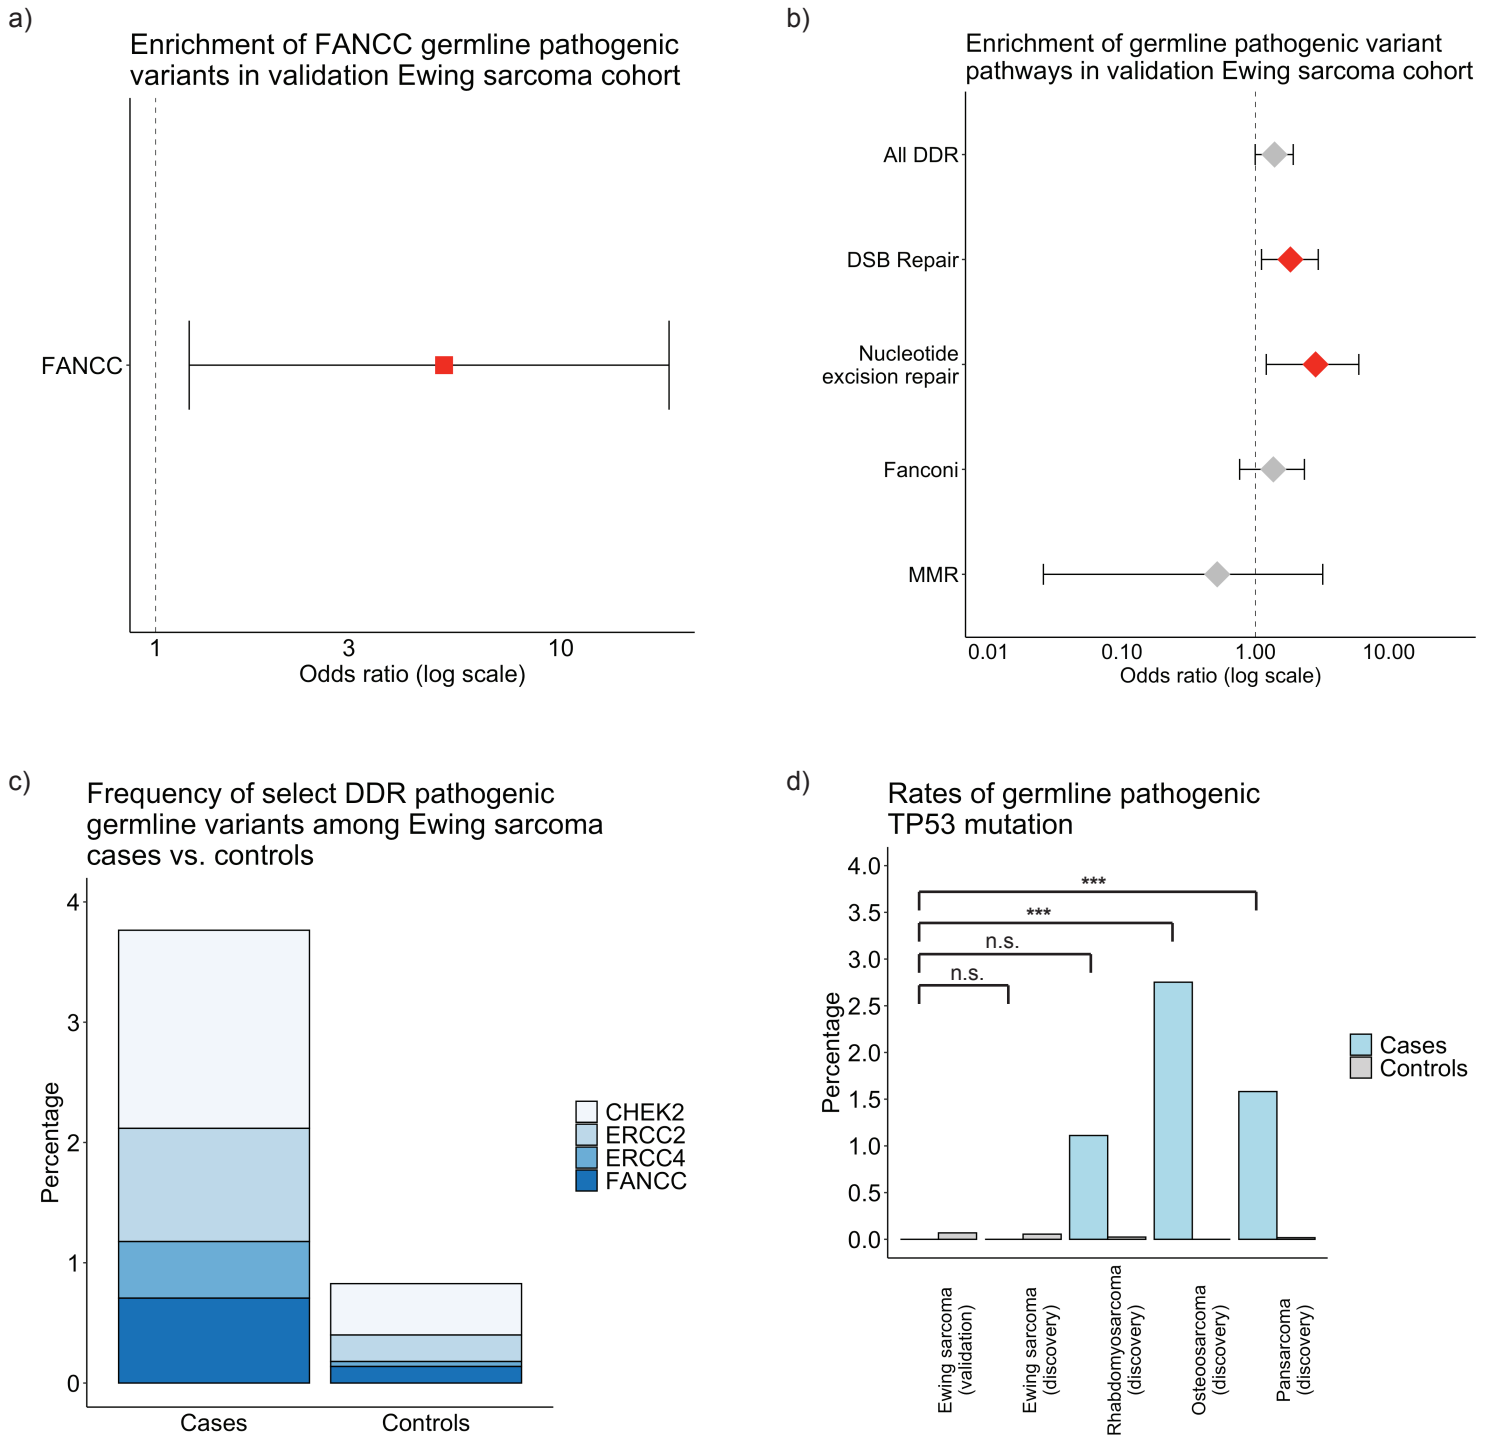

## Figure 4

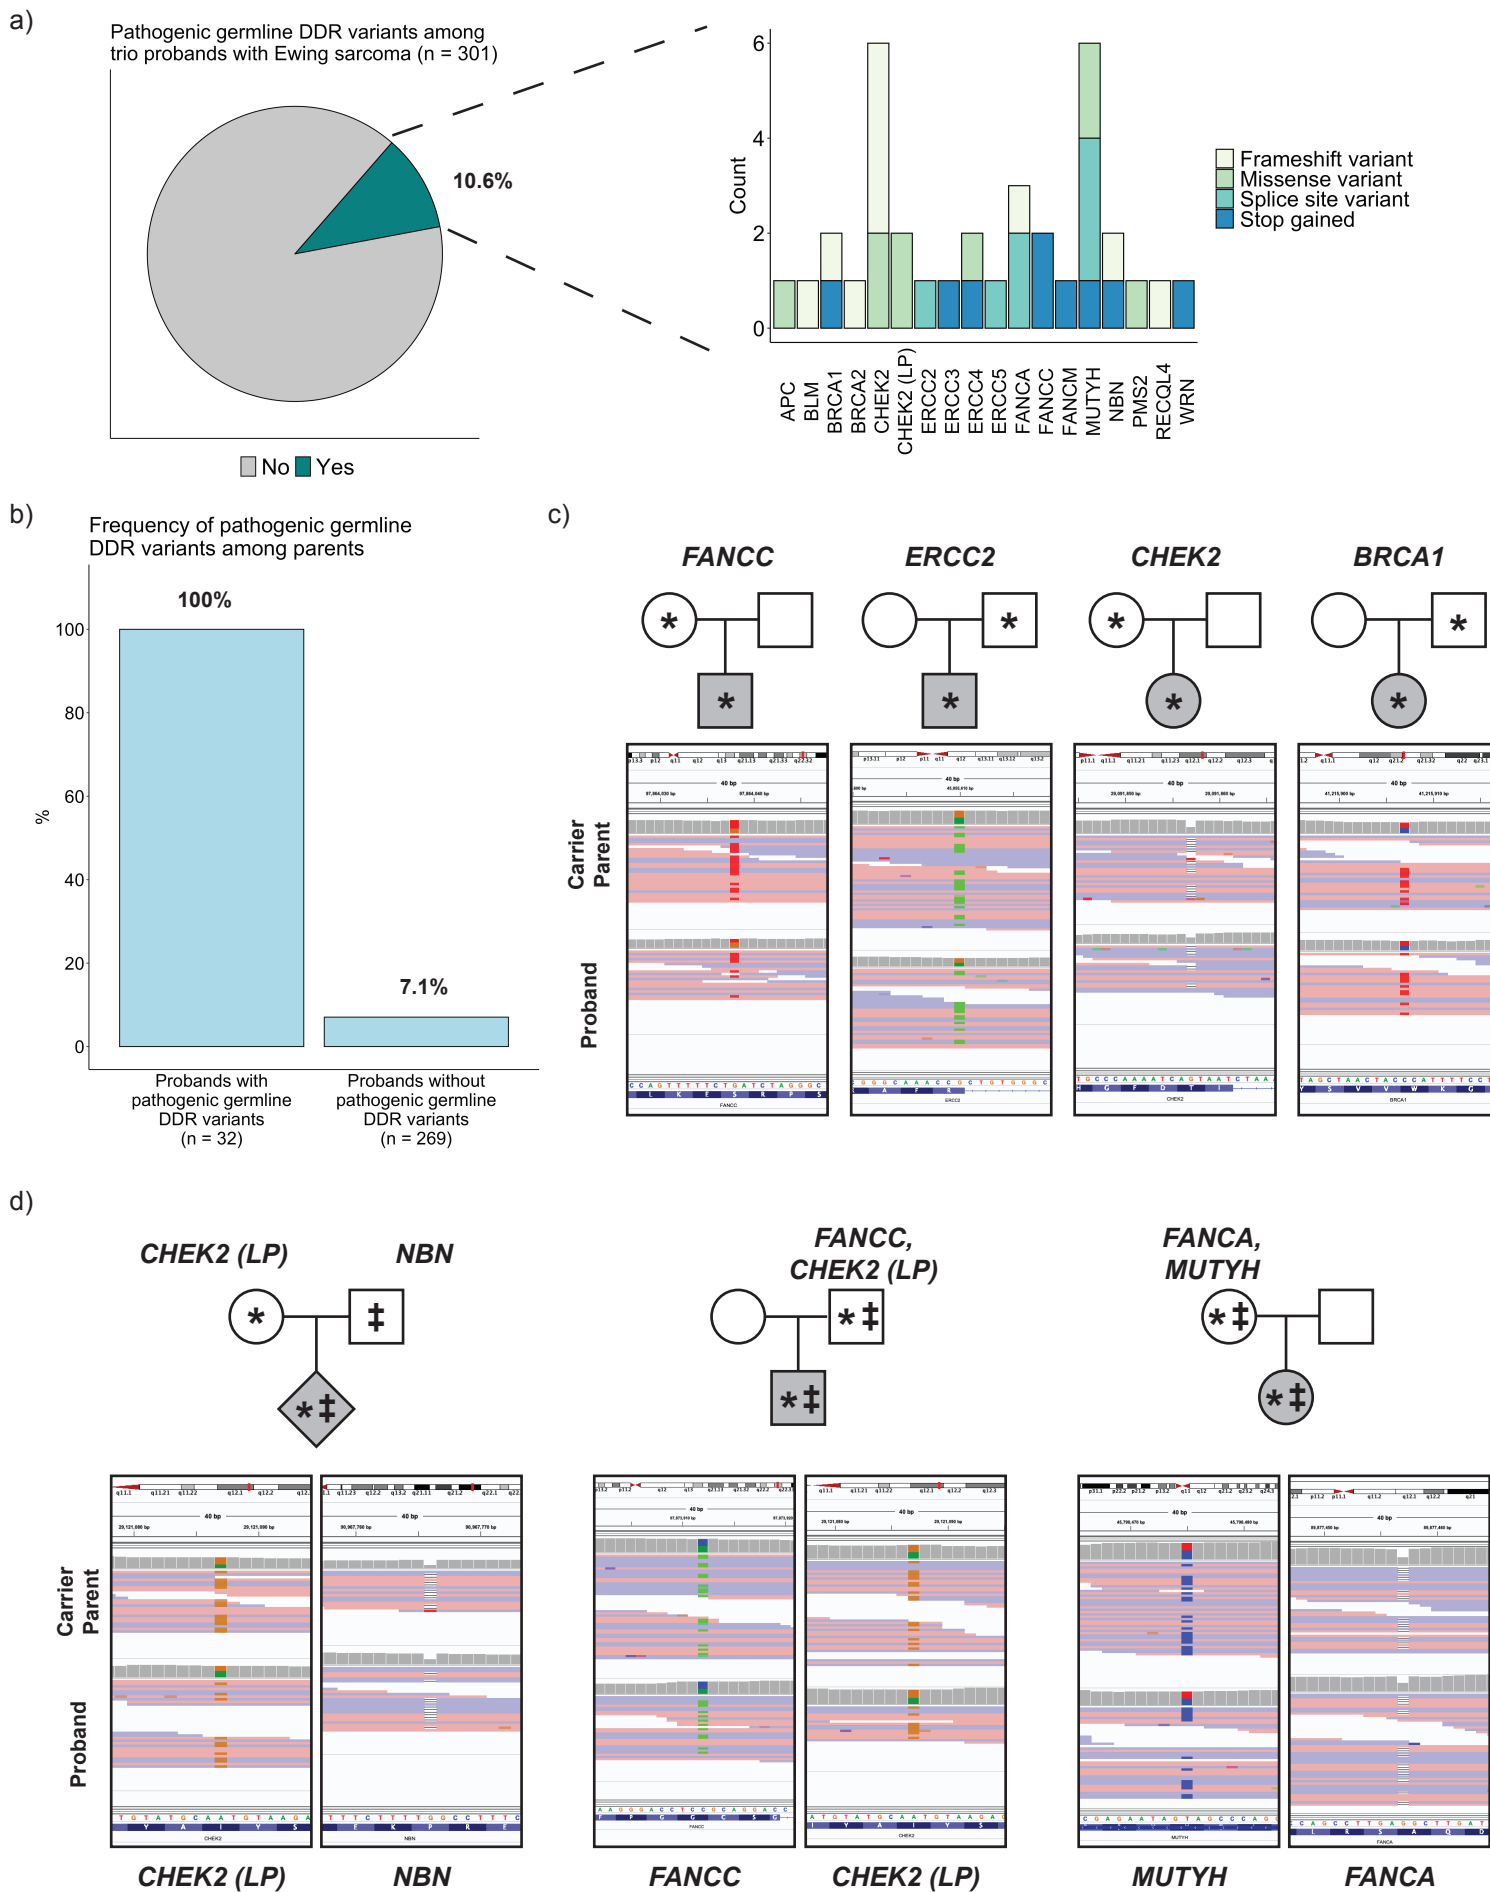

Source: https://medrxiv.org/content/10.1101/2022.01.07.22268685.full.pdf
